# Supplementary material for: Enhancing carrier generation in TiO2 by a synergistic effect between plasmon resonance in Ag nanoparticles and optical interference
Source: Royal Society of Chemistry journal article supplement (doi:10.1039/c5nr02406d), 2015-01-01
Supplement: c5nr02406d1.bib [file c5nr02406d1.bib]

@article{Bayle2014a,
abstract = {An investigation of the vibrational density of states (VDOS) in silver nanocrystals is performed using Raman scattering. A specific sample architecture, setup configuration, and original elaboration process are used in order to take simultaneously advantage of spectrally and spatially localized surface plasmon resonance, optical amplification, and dark-field spectroscopy. Disentangling the contributions of atom vibrations and electron-hole excitations (i.e., the so-called "background" in surface-enhanced Raman scattering) is performed. The extracted VDOS is successfully compared with theoretical ones obtained by atomic scale simulations. The effects of size, strain, and disorder on the VDOS are analyzed; in particular, the strain effect is investigated experimentally using the geometrical phase analysis coupled with high-resolution transmission electron microscopy. This work offers an opportunity to examine thermodynamic properties, like specific heat, at the nanoscale.},
author = {Bayle, M. and Benzo, P. and Combe, N. and Gatel, C. and Bonafos, C. and Benassayag, G. and Carles, R.},
doi = {10.1103/PhysRevB.89.195402},
issn = {1098-0121},
journal = {Physical Review B},
keywords = {CLUSTERS,CRYSTALLINE,DYNAMICS,ENHANCED RAMAN-SCATTERING,NANOPARTICLES,NANOSTRUCTURES,PHONONS,SILVER,SIZE,SPECTRA},
month = may,
number = {19},
pages = {195402},
publisher = {AMER PHYSICAL SOC, ONE PHYSICS ELLIPSE, COLLEGE PK, MD 20740-3844 USA},
title = {{Experimental investigation of the vibrational density of states and electronic excitations in metallic nanocrystals}},
url = {http://apps.webofknowledge.com/full\_record.do?product=UA\&search\_mode=GeneralSearch\&qid=43\&SID=N2aaJx1c9PUOO25ie1V\&page=1\&doc=1},
volume = {89},
year = {2014}
}
@book{Bohren1983,
abstract = {Absorption and Scattering of Light by Small ParticlesTreating absorption and scattering in equal measure, this self-contained, interdisciplinary study examines and illustrates how small particles absorb and scatter light. The authors emphasize that any discussion of the optical behavior of small particles is inseparable from a full understanding of the optical behavior of the parent material-bulk matter. To divorce one concept from the other is to render any study on scattering theory seriously incomplete.Special features and important topics covered in this book include:* Classical theories of optical properties based on idealized models* Measurements for three representative materials: magnesium oxide, aluminum, and water* An extensive discussion of electromagnetic theory* Numerous exact and approximate solutions to various scattering problems* Examples and applications from physics, astrophysics, atmospheric physics, and biophysics* Some 500 references emphasizing work done since Kerker's 1969 work on scattering theory* Computer programs for calculating scattering by spheres, coated spheres, and infinite cylinders},
author = {Bohren, Craig F. and Huffman, Donald R.},
editor = {Wiley-VCH},
isbn = {0471293407},
title = {{Absorption and scattering of light by small particles}},
url = {http://books.google.fr/books/about/Absorption\_and\_scattering\_of\_light\_by\_sm.html?id=S1RCZ8BjgN0C\&pgis=1},
year = {1983}
}
@article{Carles2011,
abstract = {A strategy to design and fabricate hybrid metallic-dielectric substrates for optical spectroscopy and imaging is proposed. Different architectures consisting of three-dimensional patterns of metallic nanoparticles embedded in dielectric layers are conceived to simultaneously exploit the optical interference phenomenon in stratified media and localized surface plasmon resonances on metal nanoparticles. These structures are based on a simultaneous control of opto-electronic properties at three scales (3S) (\~{}2/20/200 nm) and along three directions (3D). By ultralow energy ion implantation through a microfabricated stencil we precisely control the size, density, and location of silver nanoparticles embedded in silica/silicon thin films. Elastic (Rayleigh) and inelastic (Raman) scattering imaging assisted by simulations were used to analyze the optical response of these "3S-3D" patterned layers. The reflectance contrast is strongly enhanced when resonance conditions between the stationary electromagnetic field in the dielectric matrix and the localized plasmon resonance in the silver nanoparticles are realized. The potential of these 3S-3D metal-dielectric structures as surface-enhanced Raman scattering substrates is demonstrated. These novel kinds of plasmonic-photonic architectures are reproducible and stable; they preserve flat and chemically uniform surfaces, offering opportunities for the development of efficient and reusable substrates for optical spectroscopy and imaging enhancement.},
author = {Carles, Robert and Farcau, Cosmin and Bonafos, Caroline and Benassayag, G$\backslash$'\{e\}rard and Bayle, Maxime and Benzo, Patrizio and Groenen, Jesse and Zwick, Antoine},
doi = {10.1021/nn202767p},
issn = {1936-086X},
journal = {ACS Nano},
month = nov,
number = {11},
pages = {8774--82},
pmid = {21988138},
publisher = {American Chemical Society},
title = {{Three dimensional design of silver nanoparticle assemblies embedded in dielectrics for Raman spectroscopy enhancement and dark-field imaging.}},
url = {http://dx.doi.org/10.1021/nn202767p},
volume = {5},
year = {2011}
}
@book{Maier2007,
author = {Maier, Stefan Alexander},
isbn = {0387331506},
publisher = {Springer},
title = {{Plasmonics: Fundamentals and Applications}},
url = {http://www.amazon.com/Plasmonics-Fundamentals-Stefan-Alexander-Maier/dp/0387331506},
year = {2007}
}
